# Supplementary material for: Preparation of titania based biocatalytic nanoparticles and membranes for CO2conversion
Source: Royal Society of Chemistry journal article supplement (doi:10.1039/c4ta05760k), 2014-12-09
Supplement: c4ta05760k1.pdf [file c4ta05760k1.pdf]

## Electronic supplementary information

### Preparation of titania based biocatalytic nanoparticles and membranes for CO<sub>2</sub> conversion

Jingwei Hou<sup>a</sup>, Guangxi Dong<sup>a,b</sup>, Bowen Xiao<sup>a</sup>, Charly Malassigne<sup>a,c</sup> and Vicki Chen<sup>a,b\*</sup>

<sup>a</sup>UNESCO Centre for Membrane Science and Technology, School of Chemical Engineering, The University of New South Wales, Sydney, Australia. Email: v.chen@unsw.edu.au; Tel: +61-2-93854813; Fax: +61-2-93855966

<sup>b</sup>Cooperative Research Centre for Greenhouse Gas Technologies (CO2CRC), School of Chemical Engineering, The University of New South Wales, Sydney, Australia

<sup>c</sup>Polytech Nantes, Université de Nantes, France

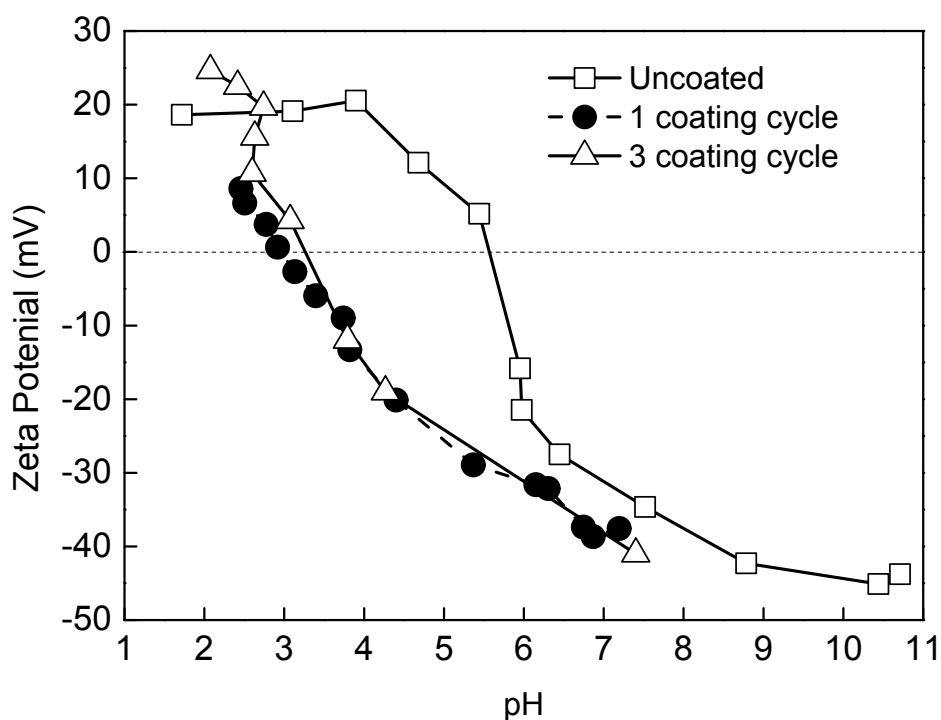

Figure S1. Membrane surface charge under different pH conditions (only 1 and 3 cycles coated membranes are presented as representatives)

Table S1. TiO<sub>2</sub> loading on polymer membrane after different coating cycles

| Sample              | TiO <sub>2</sub> loading (wt %) |
|---------------------|---------------------------------|
| 1 cycle coated PVDF | 1.3 ± 0.2 %                     |
| 2 cycle coated PVDF | 3.0 ± 0.3 %                     |
| 3 cycle coated PVDF | 4.8 ± 0.4 %                     |
| 4 cycle coated PVDF | 6.2 ± 0.4 %                     |
